# Supplementary material for: Quintuply orthogonal pyrrolysyl-tRNA synthetase/tRNAPyl pairs
Source: PubMed Central journal article supplement (PMC7615293; doi:10.1038/s41557-023-01232-y), 2023-06-15
Supplement: EMS190639-supplement-Supplementary_Notes_1_3__Figs_1_10___Tables_4_5.pdf [file EMS190639-supplement-Supplementary_Notes_1_3__Figs_1_10___Tables_4_5.pdf]

---

# Quintuply orthogonal pyrrolysyl-tRNA synthetase/tRNA<sup>Pyl</sup> pairs

---

In the format provided by the authors and unedited

---

## Table of Contents

|                               |    |
|-------------------------------|----|
| Supplementary Note 1 .....    | 2  |
| Supplementary Note 2 .....    | 2  |
| Supplementary Note 3 .....    | 2  |
| Supplementary Figure 1 .....  | 4  |
| Supplementary Figure 2 .....  | 5  |
| Supplementary Figure 3 .....  | 6  |
| Supplementary Figure 4 .....  | 7  |
| Supplementary Figure 5 .....  | 9  |
| Supplementary Figure 6 .....  | 10 |
| Supplementary Figure 7 .....  | 11 |
| Supplementary Figure 8 .....  | 12 |
| Supplementary Figure 9 .....  | 13 |
| Supplementary Figure 10 ..... | 14 |
| Supplementary Table 1 .....   | 15 |
| Supplementary Table 2 .....   | 15 |
| Supplementary Table 3 .....   | 15 |
| Supplementary Table 4 .....   | 15 |
| Supplementary Table 5 .....   | 16 |
| Supplementary Table 6 .....   | 16 |
| Supplementary Table 7 .....   | 16 |

### Supplementary Note 1

Aminoacyl-tRNA synthetase/tRNA pairs which have been used to incorporate non canonical amino acids (ncAAs) include *Methanococcus janaschii* (*Mj*) tyrosyl-tRNA synthetase (TyrRS)/*MjtRNA*<sup>Tyr</sup>, *Archaeoglobus fulgidus* (*Af*) TyrRS/*AftRNA*<sup>Tyr</sup>, *Methanococcus maripaludis* (*Mmp*) phosphoseryl-tRNA synthetase (SepRS)/*MjtRNA*<sup>Sep</sup>, *Saccharomyces cerevisiae* (*Sc*) tryptophanyl-tRNA synthetase (TrpRS)/*SctRNA*<sup>Trp</sup>, *Methanosarcina mazei* (*Mm*) or *Methanosarcina barkeri* (*Mb*) pyrrolysyl-tRNA synthetase (PylRS)/*MmtRNA*<sup>Pyl</sup> or *MbtRNA*<sup>Pyl</sup>, and engineered mutually orthogonal PylRS/tRNA<sup>Pyl</sup> pairs such as *Candidatus Methanomethylophilus sp.1R26* (*1R26*)PylRS/*Candidatus Methanomethylophilus alvus* (*Alv*)tRNA<sup>Pyl-8</sup> and *Methanomassiliicoccus luminyensis* *I* (*LumI*)PylRS/*Candidatus Methanomassiliicoccus intestinalis* (*Int*)tRNA<sup>Pyl-17C10</sup>.<sup>1-12</sup>

### Supplementary Note 2

Certain class S pyl tRNAs contain 6-8 base pair D loops, while several class C pyl tRNAs contain long variable loops. Previous studies have shown that structural elements can strongly influence tRNA<sup>Pyl</sup>:PylRS interactions;<sup>3,13</sup> indeed, the orthogonality of the PylRS/tRNA<sup>Pyl</sup> system with respect to endogenous aminoacyl-tRNA synthetases in a variety of host organisms has been attributed to the compact structure of the tRNA<sup>Pyl</sup> body.<sup>14</sup> Notably, expansions of the tRNA<sup>Pyl</sup> variable loop have previously been used to attenuate cross-reactivity by a non-cognate PylRS class, while maintaining activity with the cognate PylRS class.<sup>2,3,15,16</sup> Moreover, multiple pyl tRNAs from both classes contain unusual (adenine or uracil) nucleobases at the discriminator base position, which is a known identity element for previously characterised PylRS proteins.<sup>17,18</sup>

### Supplementary Note 3

Six PylRS enzymes (*C*<sup>A</sup>-*Nitrososphaeria archaeon* (*Nitra*)PylRS, *C*<sup>A</sup>-*Methanonatronarchaeia archaeon* (*Tron*)PylRS, *S*<sup>A</sup>-*Desulfosporosinus sp. I2* (*I2*)PylRS, *S*<sup>A</sup>-*Clostridiales bacterium* (*Clos*)PylRS, *S*<sup>A</sup>-*Deltaproteobacteria bacterium* (*Deb*)PylRS, and *S*<sup>A</sup>-*Spirochaetales bacterium* (*Spi*)PylRS) led to GFP production, at a level at least 50% of the wtGFP control, in the presence of the appropriate class C or S tRNA<sup>Pyl</sup>.

Intriguingly, the active class C PylRS enzymes showed considerable specificity towards certain class C pyl tRNAs over class S pyl tRNAs. In particular, *C-Tron*PylRS, which was highly active with the *C-Tron*tRNA<sup>Pyl</sup> (76% of wtGFP control), had less than 10% activity with all but one class S tRNA<sup>Pyl</sup> tested.

Most active class S PylRS enzymes aminoacylated pyl tRNAs within both class C and class S. However, *C-Candidatus Methanohalarchaeum thermophilum 1 (ThermI)tRNA<sup>Pyl</sup>* (and to a lesser extent, *C-Candidate division MSBL1 archaeon SCGC-AAA382A20 (SCGC)tRNA<sup>Pyl</sup>*) was poorly recognised by most active class S PylRS enzymes but formed a highly active pair with C<sup>Δ</sup>-NitraPylRS.

With regard to the previously characterised pyl tRNAs,<sup>2,3</sup> most class C and class S PylRS enzymes proved highly active with B-InttRNA<sup>Pyl</sup>, giving rise to GFP levels over 80% of the wtGFP control in some cases. In addition, several class C and class S PylRS enzymes also showed moderate to strong activity with N-MmtRNA<sup>Pyl</sup> and A<sup>Δ</sup>-AlvtRNA<sup>Pyl</sup>. Of the previously characterised PylRS enzymes, N<sup>+</sup>-MmPylRS was by far the most promiscuous, giving rise to over 50% of wild-type GFP production levels in the presence of eleven out of 16 pyl tRNAs (including all but two class S pyl tRNAs). These included S-ClostRNA<sup>Pyl</sup> and S-DebtRNA<sup>Pyl</sup>, which showed only modest activity with the most active class S PylRS enzymes. To a lesser extent, class A and class B PylRS enzymes also cross-reacted with certain class S and class C pyl tRNAs. Despite this, we were pleased to observe that C-SCGCtRNA<sup>Pyl</sup> and C-ThermItRNA<sup>Pyl</sup> were orthogonal to N<sup>+</sup>-MmPylRS, A<sup>Δ</sup>-IR26PylRS, and B<sup>Δ</sup>-LumIPylRS; this demonstrated that naturally occurring tRNA<sup>Pyl</sup> can be found that are orthogonal to PylRS enzymes taken from all other classes.

Two wild-type class S PylRS enzymes, S<sup>+</sup>-*Gemmatimonadetes bacterium (Gem)PylRS* and S<sup>+</sup>-*DebPylRS*, were expressed and showed convincing activity. S<sup>+</sup>-*GemPylRS* exhibited similar tRNA<sup>Pyl</sup> specificity to its S<sup>Δ</sup> variant. However, S<sup>+</sup>-*DebPylRS*, the most active S<sup>+</sup> system characterised, showed a markedly different activity profile to S<sup>Δ</sup>-*DebPylRS*, for instance having much higher activity with A-*AlvtRNA<sup>Pyl</sup>* (72% versus 2% of wtGFP control, respectively), but much lower activity with C-*TrontRNA<sup>Pyl</sup>* (10% vs 64%). This is consistent with reports that PylSn proteins modulate tRNA<sup>Pyl</sup> specificity.<sup>19,20</sup>

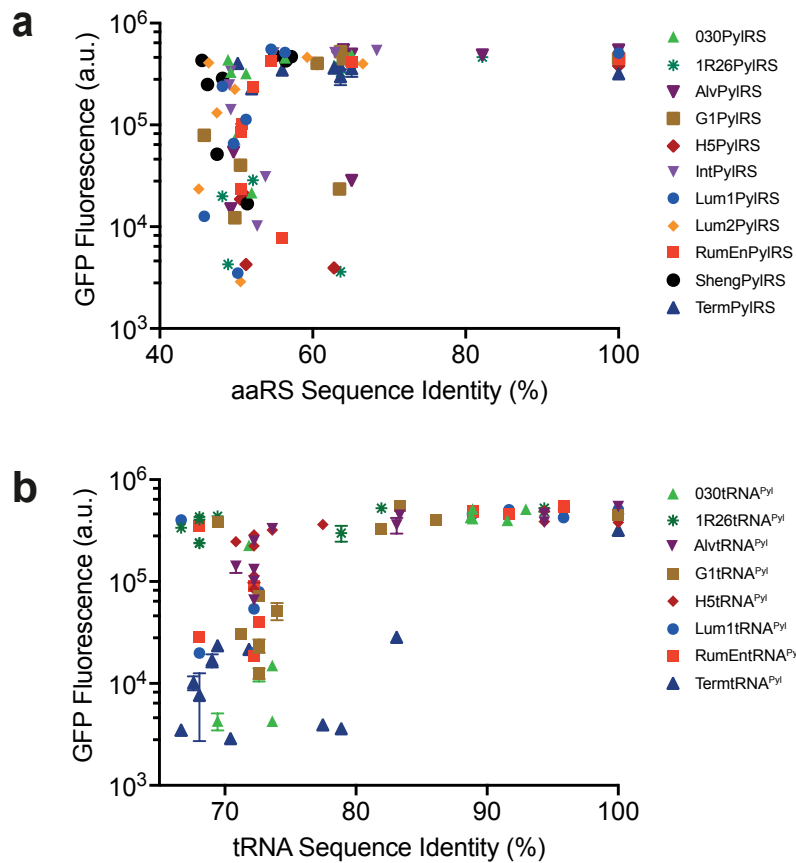

### Supplementary Figure 1

**a.** Activity of each combination of  $\Delta N$  PylRS<sub>*i*</sub> (legend) and  $\Delta N$  tRNA<sup>Pyl<sub>*j*</sub></sup>, measured by production of GFP(150AllocK)<sub>His6</sub> from cells bearing a *GFP(150TAG)*<sub>His6</sub> gene in the presence of 4 mM AllocK **1**, plotted against the sequence identity between  $\Delta N$  PylRS<sub>*i*</sub> and  $\Delta N$  PylRS<sub>*j*</sub>, where  $\Delta N$  PylRS<sub>*j*</sub> is the synthetase from the same organism as  $\Delta N$  tRNA<sup>Pyl<sub>*j*</sub></sup>. **b.** Activity of each combination  $\Delta N$  PylRS<sub>*i*</sub> and  $\Delta N$  tRNA<sup>Pyl<sub>*i*</sub></sup> (legend), plotted against the sequence identity between  $\Delta N$  tRNA<sup>Pyl<sub>*i*</sub></sup> and  $\Delta N$  tRNA<sup>Pyl<sub>*j*</sub></sup>, where  $\Delta N$  tRNA<sup>Pyl<sub>*i*</sub></sup> is the tRNA<sup>Pyl<sub>*i*</sub></sup> from the same organism as  $\Delta N$  PylRS<sub>*i*</sub>. Dots represent the mean of three biological replicates, error bars show  $\pm$  s.d.. All numerical values are provided (**Supplementary Table 2**).



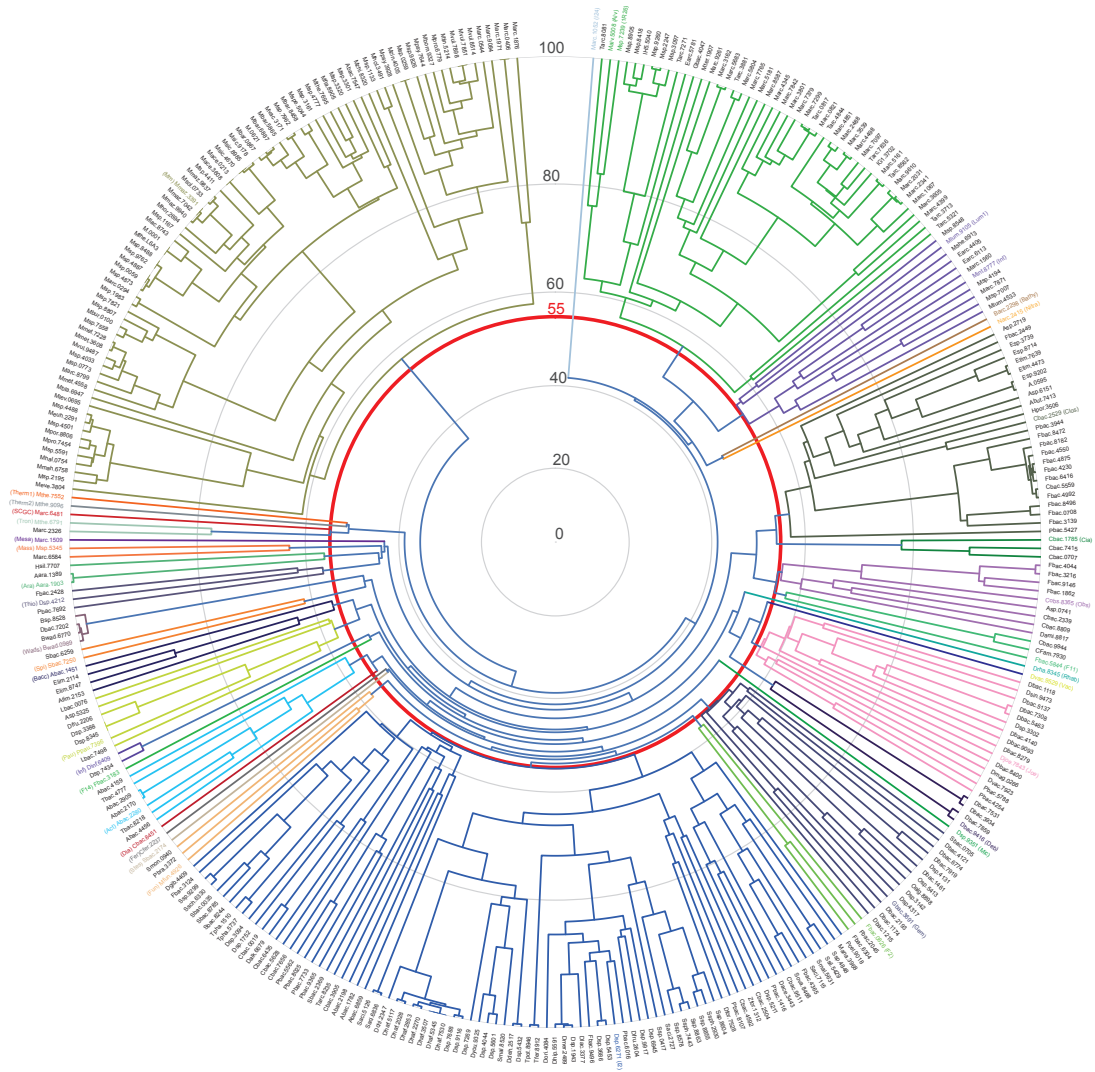

### Supplementary Figure 3

Fully annotated dendrogram showing the 37 clusters generated from agglomerative hierarchical clustering of the 351 PyIRS C-terminal domain amino acid sequences, labelled with the identifiers indexed in **Supplementary Table 1**. Coloured labels correspond to the PyIRS sequences chosen as cluster representatives. The radial coordinate represents percentage sequence identity (log scale), with grey contours corresponding to intervals of 20%. The red contour represents 55% sequence identity, the clustering threshold value. Unweighted average linkage clustering was performed using the *scikit-learn* package (version 1.0.1) in the *Python* programming language (version 3.9.7), with sequence identity scores converted to Euclidian distance measures.

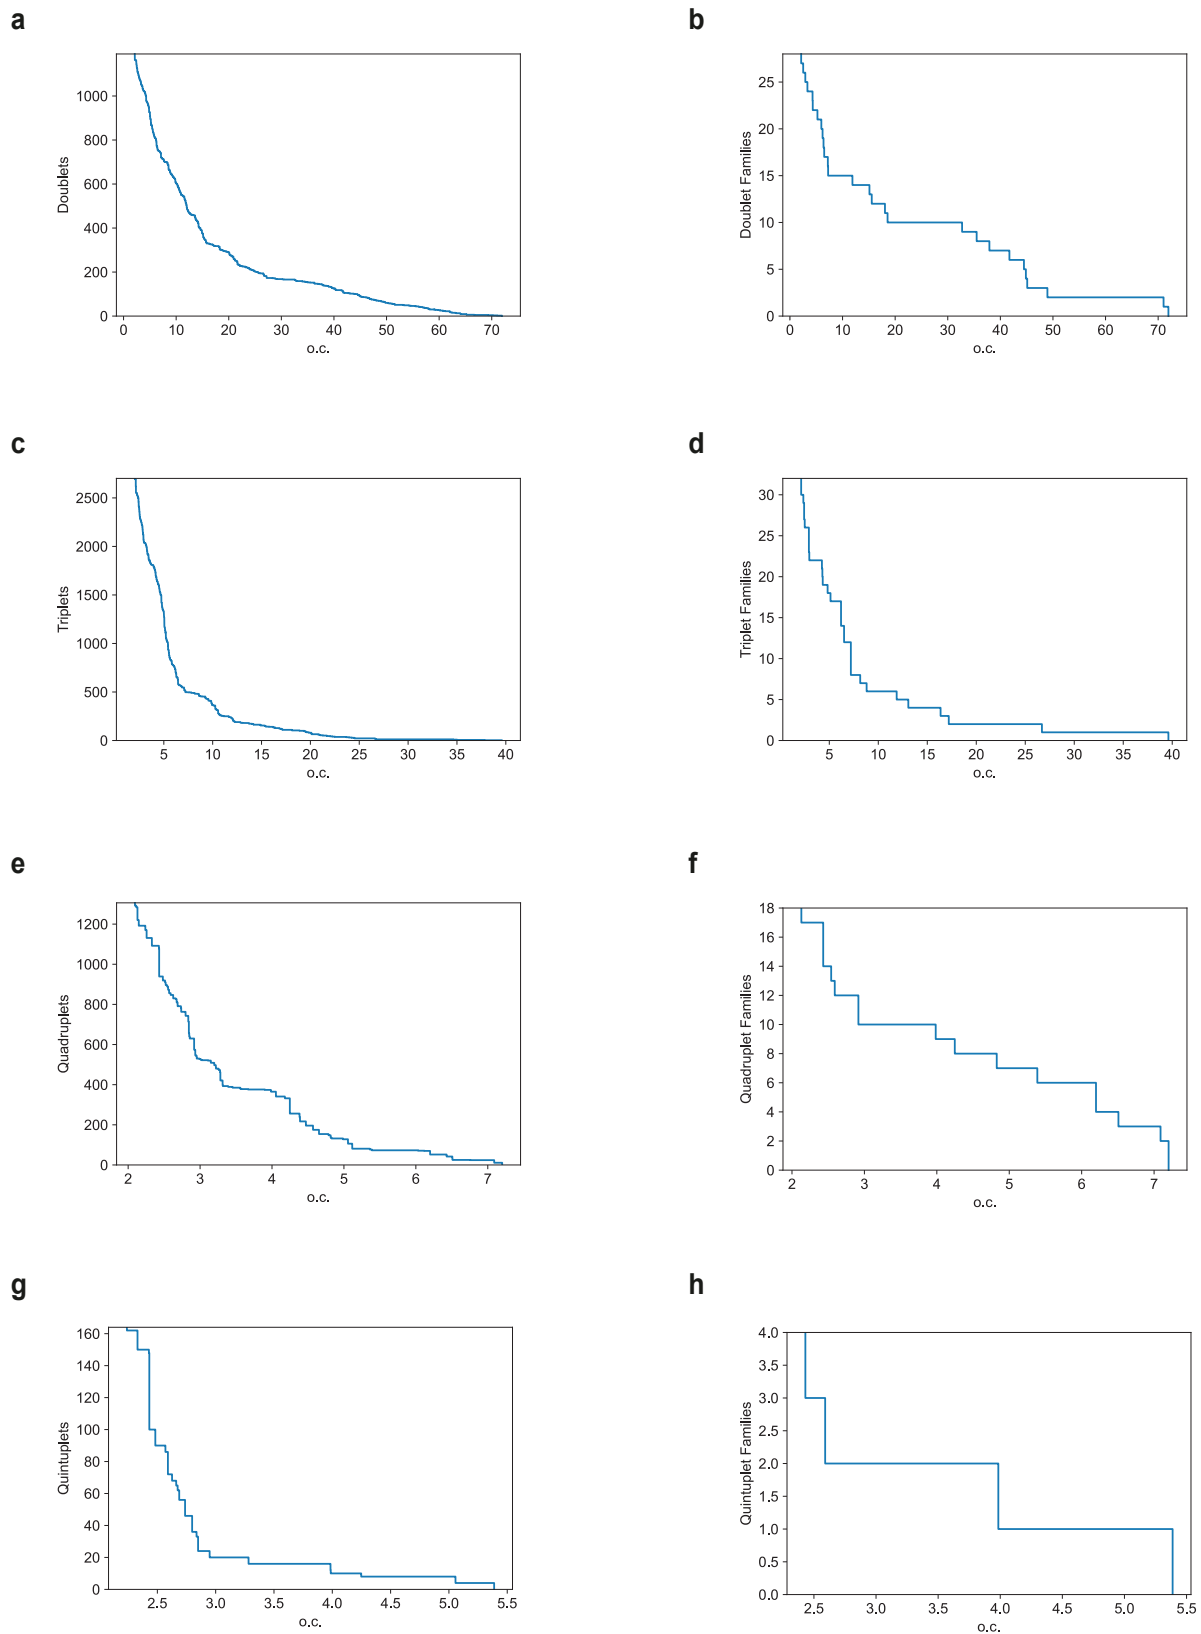

**Supplementary Figure 4**

**a.** Plot of the number of mutually orthogonal PyIRS/tRNA<sup>Pyl</sup> doublets against orthogonality coefficient (o.c.). **b.** Plot of the number of mutually orthogonal PyIRS/tRNA<sup>Pyl</sup> doublet families against orthogonality coefficient. **c.** Plot of the number of mutually orthogonal PyIRS/tRNA<sup>Pyl</sup> triplets against



orthogonality coefficient. **d.** Plot of the number of mutually orthogonal PylRS/tRNA<sup>Pyl</sup> triplet families against orthogonality coefficient. **e.** Plot of the number of mutually orthogonal PylRS/tRNA<sup>Pyl</sup> quadruplets against orthogonality coefficient. **f.** Plot of the number of mutually orthogonal PylRS/tRNA<sup>Pyl</sup> quadruplet families against orthogonality coefficient. **g.** Plot of the number of mutually orthogonal PylRS/tRNA<sup>Pyl</sup> quintuplets against orthogonality coefficient. **h.** Plot of the number of mutually orthogonal PylRS/tRNA<sup>Pyl</sup> quintuplet families against orthogonality coefficient. Orthogonality coefficient (o.c.) is the quotient of the lowest intra-pair activity over the highest inter-pair cross-reactivity. Sets of pairs were considered mutually orthogonal if the lowest intra-pair activity was greater than 40% of the wtGFP control, the highest inter-pair cross-reactivity was less than 20% of the wtGFP control, and the o.c. was higher than 2.5. We grouped mutually orthogonal sets together into families if they involved the same PylRS enzymes.

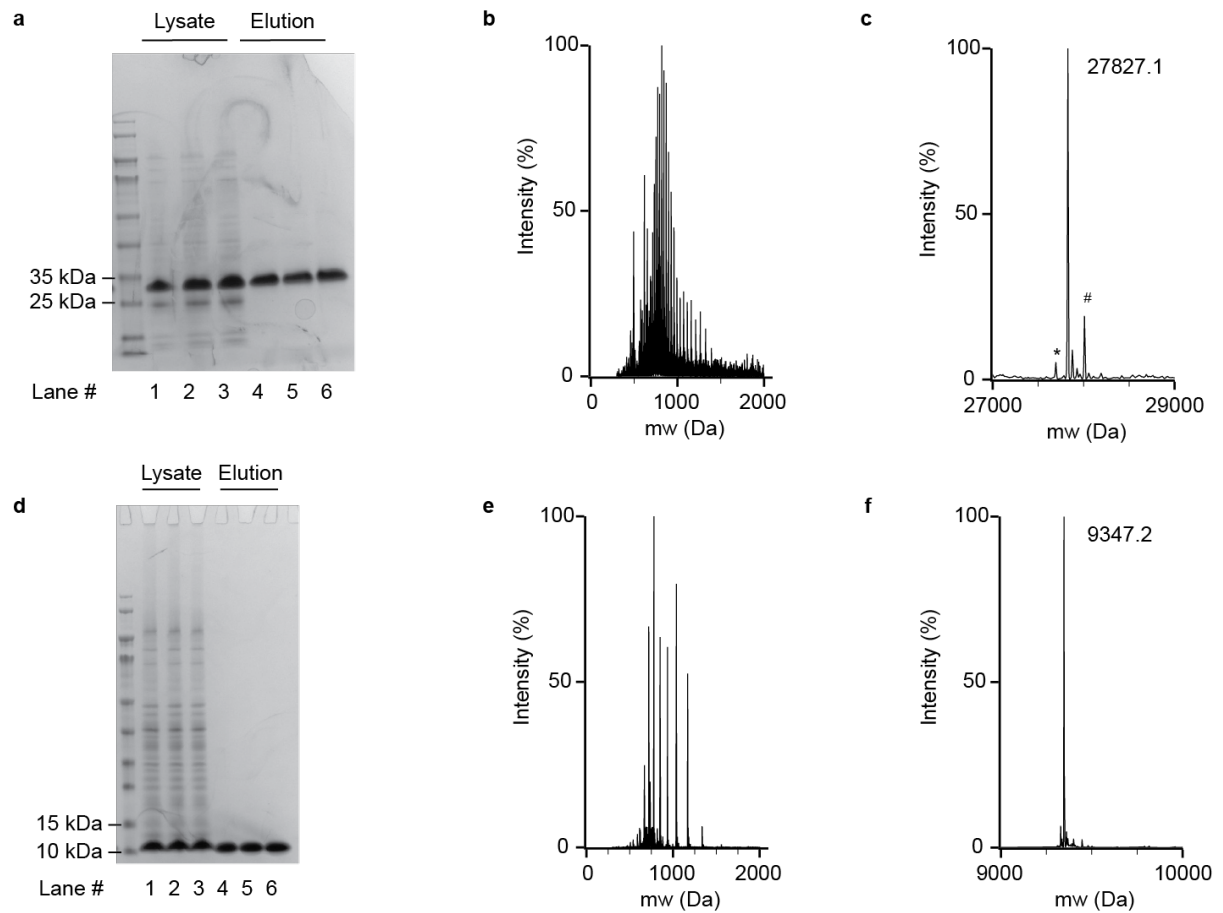

### Supplementary Figure 5

**a.** Coomassie stained SDS PAGE gel of cell lysate (lanes 1-3) and Nickel NTA purified GFP<sub>His6</sub> (lanes 4-6) from DH10B *E.coli* cells expressing GFP<sub>His6</sub> in the presence of *MmPylRS/AlvtRNA*<sup>Pyl-21</sup> and 4 mM AllocK **1**. **b.** Raw mass spectrum of the purified GFP<sub>His6</sub> shown in panel **a**. The experiment was carried out in biological triplicates with similar results. Peak lists for all replicates are given in **Supplementary Table 6**. **c.** Deconvoluted mass spectrum of the purified GFP<sub>His6</sub> shown in panel **a**. Expected mass after dehydration 27827.3, mass found 27827.1. Peak labeled with an asterisk corresponds to loss of methionine. Peak labeled with a hash corresponds to the 4-(2-Aminoethyl) benzenesulfonyl adduct (+183 m/z) resulting from the incubation with *cOmplete* proteinase inhibitor during purification. **d.** Coomassie stained SDS PAGE gel of cell lysate (lanes 1-3) and Nickel NTA purified Ub(11Ser)<sub>His6</sub> (lanes 4-6) from DH10B *E.coli* cells expressing Ub(11TCA)<sub>His6</sub> in the presence of *MmPylRS/AlvtRNA*<sup>Pyl-21</sup> and 4 mM AllocK **1**. **e.** Raw mass spectrum of the purified Ub(11Ser)<sub>His6</sub> shown in panel **d**. The experiment was carried out in biological triplicates with similar results. Peak lists for all replicates are given in **Supplementary Table 6**. **f.** Deconvoluted mass spectrum of the purified Ub(11Ser)<sub>His6</sub> shown in panel **d**. Expected mass 9346.6, mass found 9347.2.

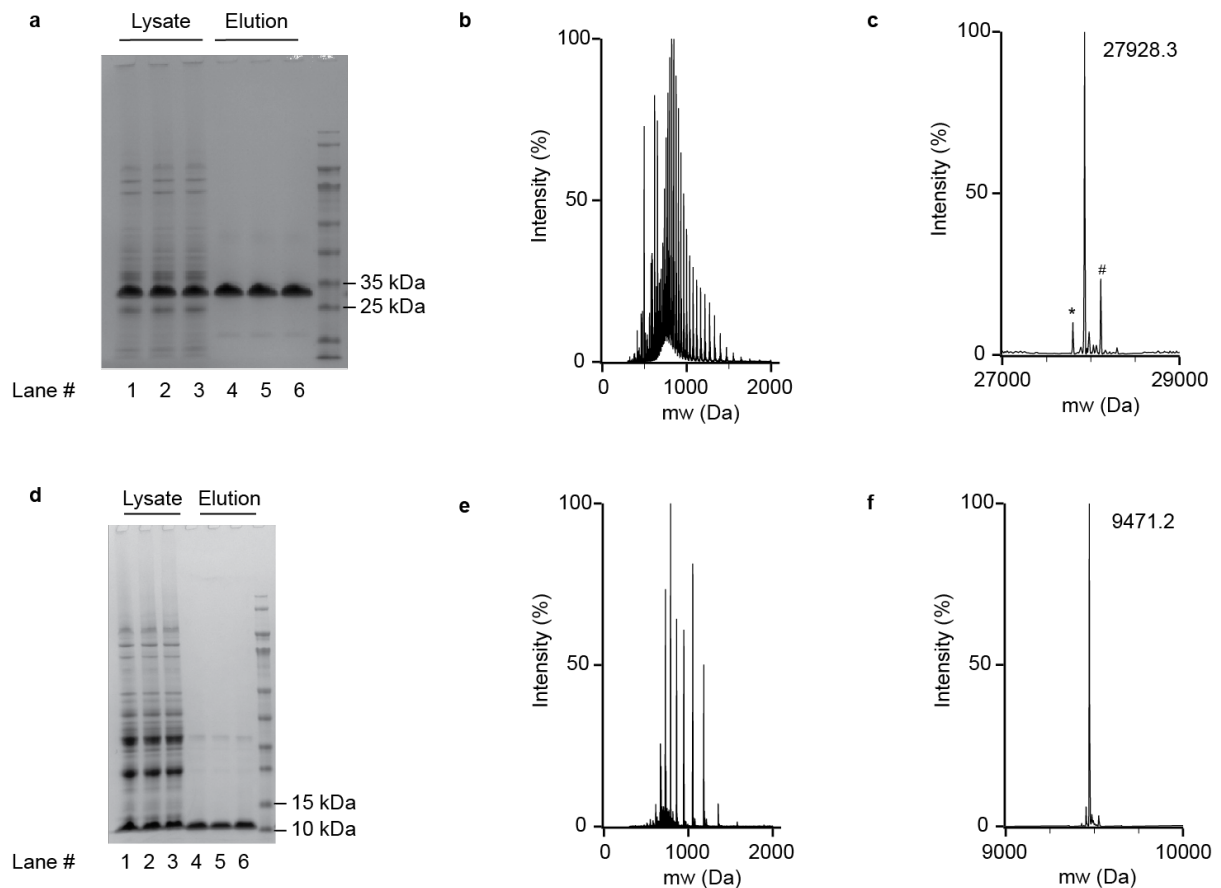

### Supplementary Figure 6

**a.** Coomassie stained SDS PAGE gel of cell lysate (lanes 1-3) and Nickel NTA purified GFP(150AllocK)<sub>His6</sub> (lanes 4-6) from DH10B *E.coli* cells expressing GFP(150TAG)<sub>His6</sub> in the presence of IR26PyIRS/*AlvtRNA*<sup>Pyl-21</sup> and 4 mM AllocK **1**. **b.** Raw mass spectrum of the purified GFP(150AllocK)<sub>His6</sub> shown in panel **a**. The experiment was carried out in biological triplicates with similar results. Peak lists for all replicates are given in **Supplementary Table 6**. **c.** Deconvoluted mass spectrum of the purified GFP(150AllocK)<sub>His6</sub> shown in panel **a**. Expected mass after dehydration 27925.4, mass found 27928.3. Peak labeled with an asterisk corresponds to loss of methionine. Peak labeled with a hash corresponds to the 4-(2-Aminoethyl) benzenesulfonyl adduct (+183 m/z) resulting from the incubation with *cOmplete* proteinase inhibitor during purification. **d.** Coomassie stained SDS PAGE gel of cell lysate (lanes 1-3) and Nickel NTA purified Ub(11AllocK)<sub>His6</sub> (lanes 4-6) from DH10B *E.coli* cells expressing Ub(11TAG)<sub>His6</sub> in the presence of IR26PyIRS/*AlvtRNA*<sup>Pyl-21</sup> and 4 mM AllocK **1**. **e.** Raw mass spectrum of the purified Ub(11AllocK)<sub>His6</sub> shown in panel **d**. The experiment was carried out in biological triplicates with similar results. Peak lists for all replicates are given in **Supplementary Table 6**. **f.** Deconvoluted mass spectrum of the purified Ub(11AllocK)<sub>His6</sub> shown in panel **d**. Expected mass 9471.7, mass found 9471.2.

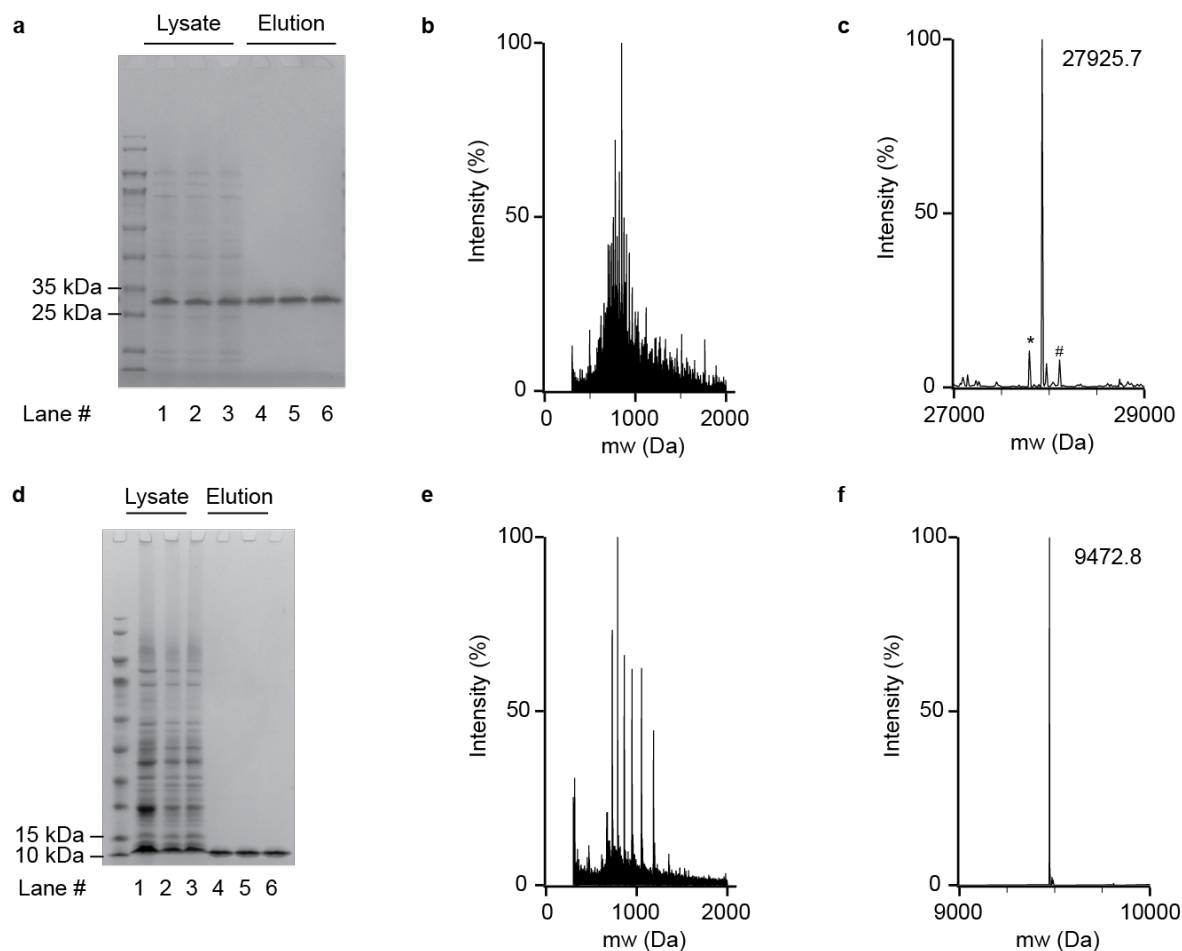

### Supplementary Figure 7

**a.** Coomassie stained SDS PAGE gel of cell lysate (lanes 1-3) and Nickel NTA purified GFP(150AllocK)<sub>His6</sub> (lanes 4-6) from DH10B *E.coli* cells expressing GFP(150TAG)<sub>His6</sub> in the presence of *DebPylRS/I2tRNA<sup>Pyl-S52</sup>* and 4 mM AllocK **1**. **b.** Raw mass spectrum of the purified GFP(150AllocK)<sub>His6</sub> shown in panel **a**. The experiment was carried out in biological triplicates with similar results. Peak lists for all replicates are given in **Supplementary Table 6**. **c.** Deconvoluted mass spectrum of the purified GFP(150AllocK)<sub>His6</sub> shown in panel **a**. Expected mass after dehydration 27925.4, mass found 27925.7. Peak labeled with an asterisk corresponds to loss of methionine. Peak labeled with a hash corresponds to the 4-(2-Aminoethyl) benzenesulfonyl adduct (+183 m/z) resulting from the incubation with *cOmplete* proteinase inhibitor during purification. **d.** Coomassie stained SDS PAGE gel of cell lysate (lanes 1-3) and Nickel NTA purified Ub(11AllocK)<sub>His6</sub> (lanes 4-6) from DH10B *E.coli* cells expressing Ub(11TAG)<sub>His6</sub> in the presence of *DebPylRS/I2tRNA<sup>Pyl-S52</sup>* and 4 mM AllocK **1**. **e.** Raw mass spectrum of the purified Ub(11AllocK)<sub>His6</sub> shown in panel **d**. The experiment was carried out in biological triplicates with similar results. Peak lists for all replicates are given in **Supplementary Table 6**. **f.** Deconvoluted mass spectrum of the purified Ub(11AllocK)<sub>His6</sub> shown in panel **d**. Expected mass 9471.7, mass found 9472.8.

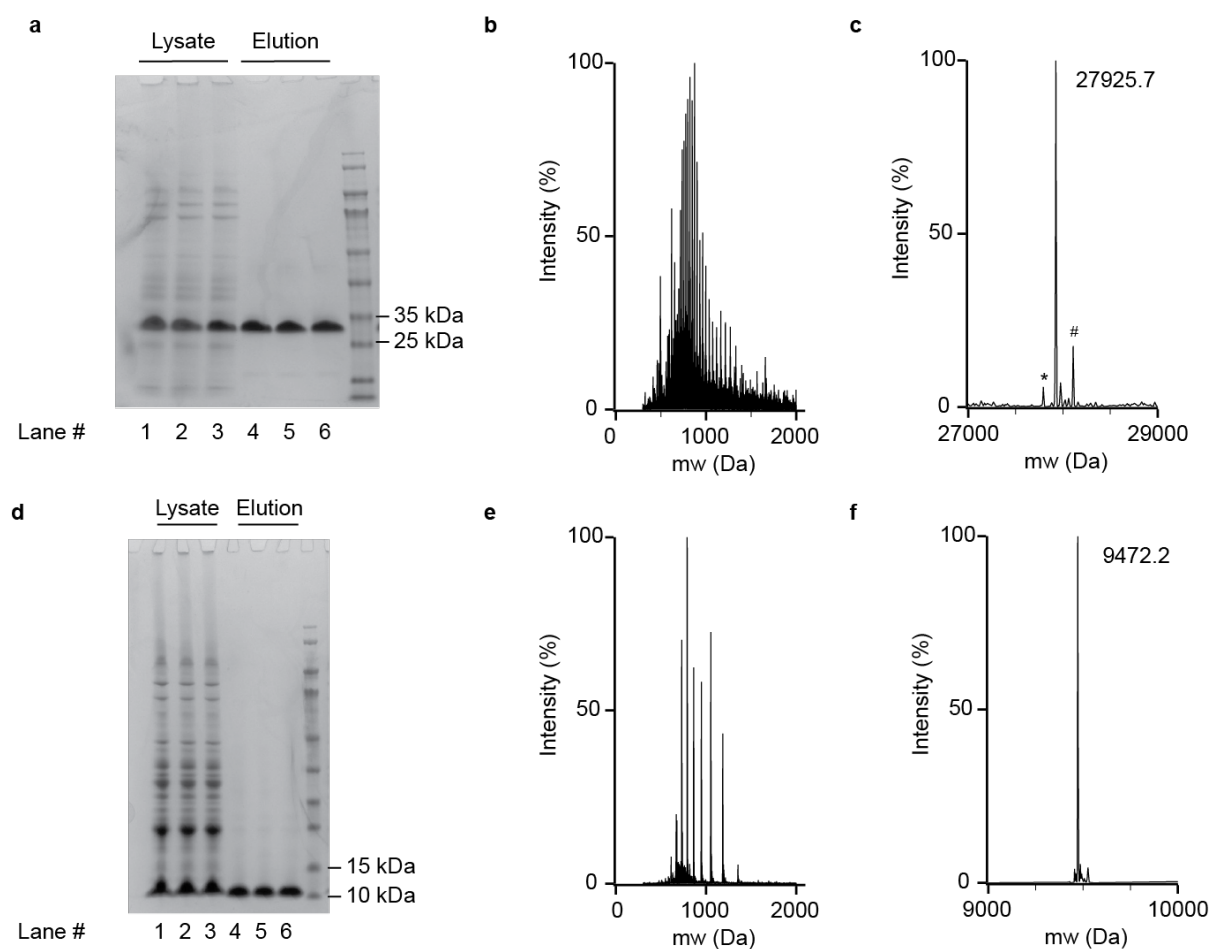

### Supplementary Figure 8

**a.** Coomassie stained SDS PAGE gel of cell lysate (lanes 1-3) and Nickel NTA purified GFP(150AllocK)<sub>His6</sub> (lanes 4-6) from DH10B *E.coli* cells expressing GFP(150TAG)<sub>His6</sub> in the presence of LumIPylRS/I2tRNA<sup>Pyl-B72</sup> and 4 mM AllocK **1**. **b.** Raw mass spectrum of the purified GFP(150AllocK)<sub>His6</sub> shown in panel **a**. The experiment was carried out in biological triplicates with similar results. Peak lists for all replicates are given in **Supplementary Table 6**. **c.** Deconvoluted mass spectrum of the purified GFP(150AllocK)<sub>His6</sub> shown in panel **a**. Expected mass after dehydration 27925.4, mass found 27925.7. Peak labeled with an asterisk corresponds to loss of methionine. Peak labeled with a hash corresponds to the 4-(2-Aminoethyl) benzenesulfonyl adduct (+183 m/z) resulting from the incubation with *cOmplete* proteinase inhibitor during purification. **d.** Coomassie stained SDS PAGE gel of cell lysate (lanes 1-3) and Nickel NTA purified Ub(11AllocK)<sub>His6</sub> (lanes 4-6) from DH10B *E.coli* cells expressing Ub(11TAG)<sub>His6</sub> in the presence of LumIPylRS/I2tRNA<sup>Pyl-B72</sup> and 4 mM AllocK **1**. **e.** Raw mass spectrum of the purified Ub(11AllocK)<sub>His6</sub> shown in panel **d**. The experiment was carried out in biological triplicates with similar results. Peak lists for all replicates are given in **Supplementary Table 6**. **f.** Deconvoluted mass spectrum of the purified Ub(11AllocK)<sub>His6</sub> shown in panel **d**. Expected mass 9471.7, mass found 9472.2.

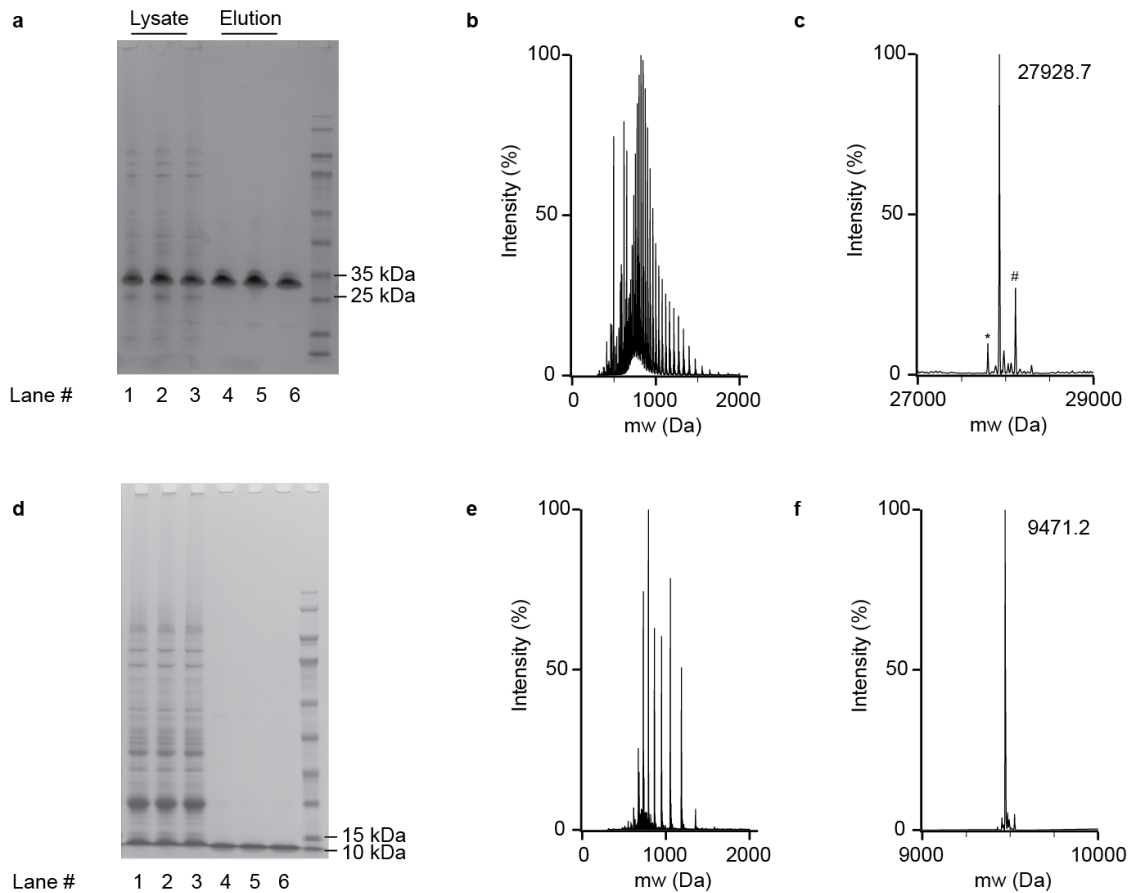

### Supplementary Figure 9

**a.** Coomassie stained SDS PAGE gel of cell lysate (lanes 1-3) and Nickel NTA purified GFP(150AllocK)<sub>His6</sub> (lanes 4-6) from DH10B *E.coli* cells expressing GFP(150TAG)<sub>His6</sub> in the presence of *MmPylRS/MettRNA<sup>Pyl</sup>* and 4 mM AllocK **1**. **b.** Raw mass spectrum of the purified GFP(150AllocK)<sub>His6</sub> shown in panel **a**. The experiment was carried out in biological triplicates with similar results. Peak lists for all replicates are given in **Supplementary Table 6**. **c.** Deconvoluted mass spectrum of the purified GFP(150AllocK)<sub>His6</sub> shown in panel **a**. Expected mass after dehydration 27925.4, mass found 27928.7. Peak labeled with an asterisk corresponds to loss of methionine. Peak labeled with a hash corresponds to the 4-(2-Aminoethyl) benzenesulfonyl adduct (+183 m/z) resulting from the incubation with *cOmplete* proteinase inhibitor during purification. **d.** Coomassie stained SDS PAGE gel of cell lysate (lanes 1-3) and Nickel NTA purified Ub(11AllocK)<sub>His6</sub> (lanes 4-6) from DH10B *E.coli* cells expressing Ub(11TAG)<sub>His6</sub> in the presence of *MmPylRS/MettRNA<sup>Pyl</sup>* and 4 mM AllocK **1**. **e.** Raw mass spectrum of the purified Ub(11AllocK)<sub>His6</sub> shown in panel **d**. The experiment was carried out in biological triplicates with similar results. Peak lists for all replicates are given in **Supplementary Table 6**. **f.** Deconvoluted mass spectrum of the purified Ub(11AllocK)<sub>His6</sub> shown in panel **d**. Expected mass 9471.7, mass found 9471.2.

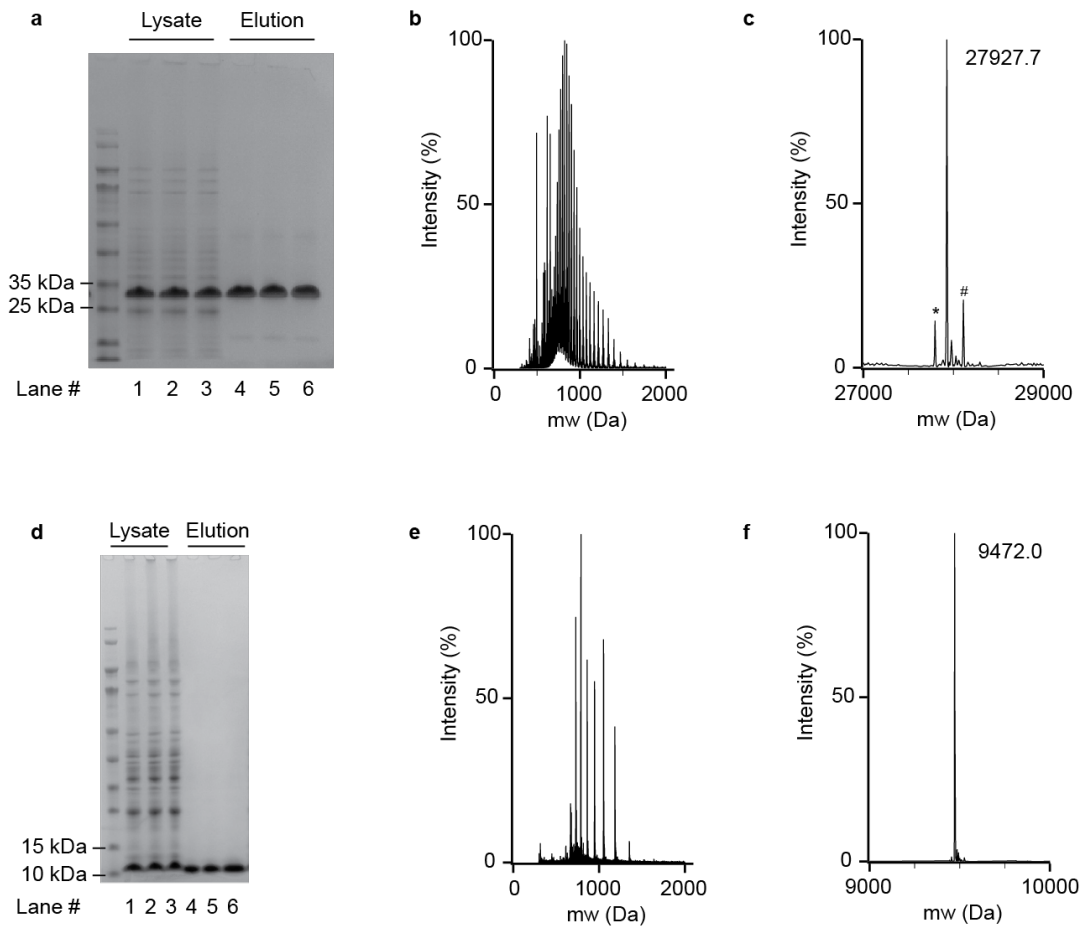

### Supplementary Figure 10

**a.** Coomassie stained SDS PAGE gel of cell lysate (lanes 1-3) and Nickel NTA purified GFP(150AllocK)<sub>His6</sub> (lanes 4-6) from DH10B *E.coli* cells expressing GFP(150TAG)<sub>His6</sub> in the presence of *NitraPylRS/ThermItRNA<sup>Pyl</sup>* and 4 mM AllocK **1**. **b.** Raw mass spectrum of the purified GFP(150AllocK)<sub>His6</sub> shown in panel **a**. The experiment was carried out in biological triplicates with similar results. Peak lists for all replicates are given in **Supplementary Table 6**. **c.** Deconvoluted mass spectrum of the purified GFP(150AllocK)<sub>His6</sub> shown in panel **a**. Expected mass after dehydration 27925.4, mass found 27927.7. Peak labeled with an asterisk corresponds to loss of methionine. Peak labeled with a hash corresponds to the 4-(2-Aminoethyl) benzenesulfonyl adduct (+183 m/z) resulting from the incubation with *cOmplete* proteinase inhibitor during purification. **d.** Coomassie stained SDS PAGE gel of cell lysate (lanes 1-3) and Nickel NTA purified Ub(11AllocK)<sub>His6</sub> (lanes 4-6) from DH10B *E.coli* cells expressing Ub(11TAG)<sub>His6</sub> in the presence of *NitraPylRS/ThermItRNA<sup>Pyl</sup>* and 4 mM AllocK **1**. **e.** Raw mass spectrum of the purified Ub(11AllocK)<sub>His6</sub> shown in panel **d**. The experiment was carried out in biological triplicates with similar results. Peak lists for all replicates are given in **Supplementary Table 6**. **f.** Deconvoluted mass spectrum of the purified Ub(11AllocK)<sub>His6</sub> shown in panel **d**. Expected mass 9471.7, mass found 9472.0.

### Supplementary Table 1

Database of PylRS and tRNA<sup>Pyl</sup> sequences together with classification resulting from hierarchical clustering. The table is provided in a separate excel sheet.

### Supplementary Table 2

Table of numerical values of all fluorescence measurements conducted in this work. The table is provided as a separate excel sheet.

### Supplementary Table 3

Sequence information of all DNA constructs used in this work. The table is provided as a separate excel sheet.

### Supplementary Table 4

Isolated protein yields for the production of GFP(150AllocK)<sub>His6</sub> from *GFP(150TAG)*<sub>His6</sub> with all the PylRS/tRNA<sup>Pyl</sup> pairs forming the most orthogonal quintuply orthogonal set. Primary data is given in

### Supplementary Table 7.

| Protein                                                                         | PylRS                         | tRNA <sup>Pyl</sup> | yield (mg/L) | % GFP(wt) |
|---------------------------------------------------------------------------------|-------------------------------|---------------------|--------------|-----------|
| GFP(150AllocK) <sub>His6</sub> produced from <i>GFP(150TAG)</i> <sub>His6</sub> | N <sup>+</sup> - <i>Mm</i>    | <i>Met</i>          | 80.2 ± 13.6  | 97        |
|                                                                                 | A <sup>Δ</sup> - <i>IR26</i>  | <i>Alv-21</i>       | 116.8 ± 11.6 | 141       |
|                                                                                 | C <sup>Δ</sup> - <i>Nitra</i> | <i>Therm1</i>       | 102.0 ± 15.5 | 123       |
|                                                                                 | S <sup>+</sup> - <i>Deb</i>   | <i>I2-S52</i>       | 27.3 ± 1.6   | 33        |
|                                                                                 | B <sup>Δ</sup> - <i>Lum1</i>  | <i>I2-B72</i>       | 96.1 ± 8.9   | 116       |
| GFP <sub>His6</sub> produced from <i>GFP</i> <sub>His6</sub>                    | N <sup>+</sup> - <i>Mm</i>    | <i>Alv-21</i>       | 82.6 ± 1.9   | 100       |



### Supplementary Table 5

Summary of isolated protein yields for the production of Ub(11AllocK)<sub>His6</sub> from *Ub(11TAG)*<sub>His6</sub> with the all PyIRS/tRNA<sup>PyI</sup> pairs forming the most orthogonal quintuply orthogonal set. Primary data is given in **Supplementary Table 7**.

| Protein                                                                        | PyIRS                         | tRNA <sup>PyI</sup> | yield (mg/L) | % Ub(K11S) |
|--------------------------------------------------------------------------------|-------------------------------|---------------------|--------------|------------|
| Ub(11AllocK) <sub>His6</sub> produced from<br><i>Ub(11TAG)</i> <sub>His6</sub> | N <sup>+</sup> - <i>Mm</i>    | <i>Met</i>          | 37.4 ± 0.1   | 76         |
|                                                                                | A <sup>Δ</sup> - <i>IR26</i>  | <i>Alv-21</i>       | 36.9 ± 2.9   | 75         |
|                                                                                | C <sup>Δ</sup> - <i>Nitra</i> | <i>Therm1</i>       | 31.0 ± 2.1   | 63         |
|                                                                                | S <sup>+</sup> - <i>Deb</i>   | <i>I2-S52</i>       | 22.7 ± 0.7   | 46         |
|                                                                                | B <sup>Δ</sup> - <i>Lum1</i>  | <i>I2-B72</i>       | 43.7 ± 2.3   | 89         |
| Ub(11Ser) <sub>His6</sub> produced from<br><i>Ub(11TCA)</i> <sub>His6</sub>    | N <sup>+</sup> - <i>Mm</i>    | <i>Alv-21</i>       | 49.3 ± 1.6   | 100        |

### Supplementary Table 6

Peak lists of all mass spectrometry data acquired in this work. The table is provided as a separate excel sheet.

### Supplementary Table 7

Primary data of protein yield determination from **Supplementary Tables 4 and 5**. The table is provided as a separate excel sheet.

## References

- 1 Cervettini, D. *et al.* Rapid discovery and evolution of orthogonal aminoacyl-tRNA synthetase–tRNA pairs. *Nat. Biotechnol.*, 1–11 (2020). <https://doi.org:10.1038/s41587-020-0479-2>
- 2 Dunkelmann, D. L., Willis, J. C. W., Beattie, A. T. & Chin, J. W. Engineered triply orthogonal pyrrolysyl–tRNA synthetase/tRNA pairs enable the genetic encoding of three distinct non-canonical amino acids. *Nature Chemistry* **12**, 535–544 (2020). <https://doi.org:10.1038/s41557-020-0472-x>
- 3 Willis, J. C. W. & Chin, J. W. Mutually orthogonal pyrrolysyl-tRNA synthetase/tRNA pairs. *Nature Chemistry* **10**, 831–837 (2018). <https://doi.org:10.1038/s41557-018-0052-5>
- 4 Srinivasan, G., James, C. M. & Krzycki, J. A. Pyrrolysine Encoded by UAG in Archaea: Charging of a UAG-Decoding Specialized tRNA. *Science* **296**, 1459–1462 (2002). <https://doi.org:10.1126/science.1069588>
- 5 Krzycki, J. A. The direct genetic encoding of pyrrolysine. *Curr. Opin. Microbiol.* **8**, 706–712 (2005). <https://doi.org:10.1016/j.mib.2005.10.009>
- 6 Neumann, H., Peak-Chew, S. Y. & Chin, J. W. Genetically encoding N $\epsilon$ -acetyllysine in recombinant proteins. *Nat. Chem. Biol.* **4**, 232 (2008). <https://doi.org:10.1038/nchembio.73>
- 7 Wang, L., Brock, A., Herberich, B. & Schultz, P. G. Expanding the Genetic Code of *Escherichia coli*. *Science* **292**, 498–500 (2001). <https://doi.org:10.1126/science.1060077>
- 8 Borrel, G. *et al.* Unique Characteristics of the Pyrrolysine System in the 7th Order of Methanogens: Implications for the Evolution of a Genetic Code Expansion Cassette. *Archaea* **2014**, 11 (2014). <https://doi.org:10.1155/2014/374146>
- 9 Park, H.-S. *et al.* Expanding the Genetic Code of *Escherichia coli* with Phosphoserine. *Science* **333**, 1151–1154 (2011). <https://doi.org:10.1126/science.1207203>
- 10 Rogerson, D. T. *et al.* Efficient genetic encoding of phosphoserine and its nonhydrolyzable analog. *Nat. Chem. Biol.* **11**, 496 (2015). <https://doi.org:10.1038/nchembio.1823>
- 11 Hughes, R. A. & Ellington, A. D. Rational design of an orthogonal tryptophanyl nonsense suppressor tRNA. *Nucleic Acids Research* **38**, 6813–6830 (2010). <https://doi.org:10.1093/nar/gkq521>
- 12 Chatterjee, A., Sun, S. B., Furman, J. L., Xiao, H. & Schultz, P. G. A Versatile Platform for Single- and Multiple-Unnatural Amino Acid Mutagenesis in *Escherichia coli*. *American Chemical Society* (2013). <https://doi.org:10.1021/bi4000244>
- 13 Fan, C., Xiong, H., Reynolds, N. M. & Söll, D. Rationally evolving tRNA<sup>Pyl</sup> for efficient incorporation of noncanonical amino acids. *Nucleic Acids Research* **43**, e156–e156 (2015). <https://doi.org:10.1093/nar/gkv800>

- 14 Nozawa, K. *et al.* Pyrrolysyl-tRNA synthetase–tRNA<sup>Pyl</sup> structure reveals the molecular basis of orthogonality. *Nature* **457**, 1163 (2008). <https://doi.org/10.1038/nature07611>
- 15 Meineke, B., Heimgärtner, J., Lafranchi, L. & Elsässer, S. J. Methanomethylophilus alvus Mx1201 Provides Basis for Mutual Orthogonal Pyrrolysyl tRNA/Aminoacyl-tRNA Synthetase Pairs in Mammalian Cells. *ACS Chemical Biology* **13**, 3087-3096 (2018). <https://doi.org/10.1021/acscchembio.8b00571>
- 16 Meineke, B., Heimgärtner, J., Eirich, J., Landreh, M. & Elsässer, S. J. Site-Specific Incorporation of Two ncAAs for Two-Color Bioorthogonal Labeling and Crosslinking of Proteins on Live Mammalian Cells. *Cell Reports* **31**, 107811 (2020). <https://doi.org/10.1016/j.celrep.2020.107811>
- 17 Ambrogelly, A. *et al.* Pyrrolysine is not hardwired for cotranslational insertion at UAG codons. *Proc. Natl. Acad. Sci. U.S.A.* **104**, 3141--3146 (2007). <https://doi.org/10.1073/pnas.0611634104>
- 18 Zhang, H. *et al.* The tRNA discriminator base defines the mutual orthogonality of two distinct pyrrolysyl-tRNA synthetase/tRNAPyl pairs in the same organism. *Nucleic Acids Research* **50**, 4601-4615 (2022). <https://doi.org/10.1093/nar/gkac271>
- 19 Suzuki, T. *et al.* Crystal structures reveal an elusive functional domain of pyrrolysyl-tRNA synthetase. *Nat. Chem. Biol.* **13**, 1261 (2017). <https://doi.org/10.1038/nchembio.2497>
- 20 Herring, S. *et al.* The amino-terminal domain of pyrrolysyl-tRNA synthetase is dispensable in vitro but required for in vivo activity. *FEBS Lett.* **581**, 3197--3203 (2007). <https://doi.org/10.1016/j.febslet.2007.06.004>
